## LABORATORY REPORT

Anesthesiology  
Dec 1998; 89:1592-5  
© Dec 1998 American Society of Anesthesiologists, Inc.  
Lippincott Williams & Wilkins

# Continuous Cardiac Output Catheters

## Delay in In Vitro Response Time after Controlled Flow Changes

Margaret Aranda, M.D.,\* Frederick G. Mihm M.D.,† Sheryl Garrett M.D.,‡ Megan N. Mihm,§  
Ronald G. Pearl, Ph.D., M.D.||

CONTINUOUS measurement of cardiac output (CO) may improve the timely treatment of high-risk patients.<sup>1,2</sup> The available continuous CO (CCO) monitors measure CO by a modified thermodilution technique using a filament to generate heat. The two marketed CCO monitors are the CCO/oximetry "Vigilance" thermodilution catheter (Baxter, Deerfield, IL) and the "Opti-Q" mixed venous oxygen saturation ( $\bar{Sv}_{O_2}$ )/CCO catheter (Abbott, Abbott Park, IL). The thermal signal, the signal-to-noise ratio, and thermal noise affect the accuracy of the systems. Differences in the heated element, the thermal signal, the signal-to-noise ratio, and thermal noise affect the accuracy of the systems. The purpose of this study was to compare *in vitro* response times of these catheters to different flow rates, temperatures, and thermal noise.

### Methods

A CCO pulmonary artery catheter inserted into a rubber cast the size of the superior vena cava, the right ventricle, and the pulmonary artery was placed in a custom-made flow bath containing 30 l of pumped nor-

mal saline. The Abbott Opti-Q  $\bar{Sv}_{O_2}$ /CCO thermodilution catheter (Model 52509; 8 French, 110 cm; software version 1.08) has a 15-cm thermal coil. The Baxter CCO/Oximetry ( $\bar{Sv}_{O_2}$ ) catheter (model 744H; 7.5 French, 110 cm; software version 4.42) has an 11-cm thermal filament.

The response time to changes in flow was tested during different conditions. Bath temperatures were accurate to  $\pm 0.3^\circ\text{C}$ , flow rates were accurate to  $\pm 0.32$  l/min, each change in CO was maintained for 30 min, and the displayed CCO value was recorded every 20 s. Baseline measurements were obtained after a 30-min stabilization period at  $37^\circ\text{C}$  and a flow rate of 3 l/min. Flow was increased to 7 l/min and then decreased to 3 l/min (fig. 1). Flow was increased to 5, 7, and 9 l/min and then decreased to 7, 5, and 3 l/min. Three catheters of each type were studied separately, and the experiment was repeated at  $35^\circ\text{C}$  and  $39^\circ\text{C}$ . The effect of a slower change in CO at  $37^\circ\text{C}$  was evaluated by changing flow from 3 to 7 l/min and from 7 to 3 l/min in steps of 1 l/min every 2 min.

In a separate series of catheters, baseline fluctuations in pulmonary artery temperature, previously recorded from 13 Stanford University Hospital intensive care unit patients, were used to superimpose "thermal noise" on the pump system. Stabilization for 60 min occurred, and then changes in flow from 3 to 7 l/min and back to 3 l/min were evaluated.

### Data Analysis

The time delay between flow change and the display of 20, 50, and 80% of maximal CCO change was noted, as described by Siegel *et al.*<sup>3</sup> These values have clinical usefulness as detecting change (20% change), magnitude of change (50% change), and total change (80% change). Data from three catheters of each type were combined and analyzed by analysis of variance and the Newman-Keuls test, with a probability value  $< 0.05$  considered significant.

\* Fellow, Critical Care Medicine; currently Assistant Professor of Anesthesia, University of Pennsylvania.

† Professor of Anesthesia.

‡ Fellow, Critical Care Medicine.

§ Research Assistant

|| Associate Professor of Anesthesia.

Received from the Department of Anesthesia, Stanford University Medical Center, Stanford, California. Submitted for publication January 22, 1998. Accepted for publication July 13, 1998. Supported in part by a grant from Abbott Laboratories, Abbott Park, Illinois.

Address reprint requests to Dr. Pearl: Department of Anesthesia, S-278, Stanford University Medical Center, Stanford, California 94305-5117. Address electronic mail to: rgp@leland.stanford.edu

Key Words: Blood flow; measurement techniques; pulmonary artery catheter; thermodilution.

## LABORATORY REPORT

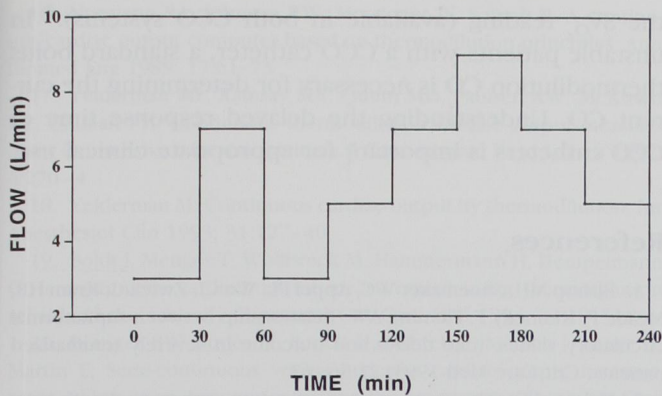

Fig. 1. Diagram of the changes in flow over time. A flow rate of 3 l/min was maintained for the initial 30 min. Flow was then increased to 7 l/min for 30 min, followed by a decrease to 3 l/min for 30 min. Flow was then increased to 5, 7, and 9 l/min for 30 min each and then decreased to 7, 5, and 3 l/min for 30 min each.

## Results

There were 6,340 recorded CO values. At 37°C, when flow increased from 3 to 7 l/min, the eventual increase in CCO was  $4.14 \pm 0.25$  l/min for the Abbott catheter and  $4.16 \pm 0.19$  l/min for the Baxter catheter. However, both catheters showed a 4 to 5 min delay in response time (fig. 2). When flow decreased to 3 l/min, a 50% change occurred at 4 to 5 min with the Abbott catheter and at 10 min with the Baxter catheter. Combining the data for the six 2-l/min flow rate changes, the 20, 50, and 80% response times for the Abbott and Baxter catheters were  $2.9 \pm 0.2$  min versus  $3.3 \pm 0.3$  min;  $3.9 \pm 0.1$  min versus  $6.6 \pm 0.8$  min ( $P < 0.01$ ); and  $4.7 \pm 0.2$  min versus  $11.2 \pm 1.1$  min ( $P < 0.01$ ), respectively.

For flow changes (increases and decreases combined) between 3 and 7 l/min at 35°C, the Abbott versus Baxter catheters had 20, 50 and 80% change at the following times:  $3.5 \pm 0.2$  min versus  $4.8 \pm 0.7$  min ( $P < 0.05$ );  $4.1 \pm 0.2$  min versus  $6.7 \pm 1.0$  min ( $P < 0.05$ ); and  $4.9 \pm 0.3$  min versus  $11.7 \pm 3.2$  min ( $P < 0.05$ ), respectively. At 39°C, changes at these time points for Abbott versus Baxter were  $3.7 \pm 0.3$  min versus  $4.5 \pm 0.6$  min;  $4.3 \pm 0.3$  min versus  $5.9 \pm 0.4$  min ( $P < 0.05$ ); and  $5.3 \pm 0.4$  min versus  $6.5 \pm 0.3$  min ( $P < 0.05$ ), respectively. With superimposed thermal noise, both systems needed more than 30 min for stabilization at constant flow. With thermal noise, combined changes for the three time points for Abbott versus Baxter catheter were  $4.5 \pm 0.5$  min versus  $10.8 \pm 0.6$  min ( $P < 0.05$ );  $6.5 \pm 0.2$  min versus  $13.5 \pm 4.4$  min ( $P < 0.05$ ) and  $10.2 \pm 1.5$  min versus  $20.1 \pm 4.2$  min ( $P < 0.05$ ),

respectively. A clinically relevant delay in response time occurs with both catheters.

When flow was changed by 1 l/min every 2 min, no catheter detected the change within that 2-min time period. Therefore, the response times for the change from 3 to 7 l/min over the 8-min time period were analyzed as a single flow change. For the Abbott and Baxter catheters the 20, 50, and 80% response times were  $5.3 \pm 0.1$  min versus  $6.5 \pm 0.8$  min;  $8.8 \pm 0.1$  min versus  $7.6 \pm 0.6$  min, and  $11.1 \pm 1.1$  min versus  $10.8 \pm 0.3$  min, respectively.

## Discussion

Noninvasive CCO systems include transthoracic electrical bioimpedance,<sup>4,5</sup> suprasternal continuous-wave Doppler ultrasonography,<sup>6</sup> and transcutaneous continuous-wave ultrasonic Doppler.<sup>7,8</sup> Although studies have suggested limited accuracy of these devices in clinical use, Thangathurai *et al.*<sup>9</sup> noted improved performance of the recent thoracic bioimpedance device. Continuous, invasive methods include transesophageal Doppler,<sup>10,11</sup> transtracheal Doppler,<sup>12,13</sup> transesophageal Doppler echocardiography,<sup>14</sup> and automated border detection.<sup>15</sup> The Baxter CCO catheter has comparable accuracy compared with standard thermodilution CO in stable surgical and critically ill patients.<sup>16-22</sup> Its reliability has been questioned with cold-fluid infusion,<sup>23</sup> after hypothermic cardiopulmonary bypass,<sup>24</sup> and in postreperfusion of liver transplantation.<sup>25</sup> Response time delays of 5-7 min have been shown in sheep during hemodynamic changes<sup>3</sup> and in critically ill patients.<sup>23</sup> The Abbott catheter has been shown to be accurate in stable patients,<sup>26</sup> but its response time has not been studied previously.

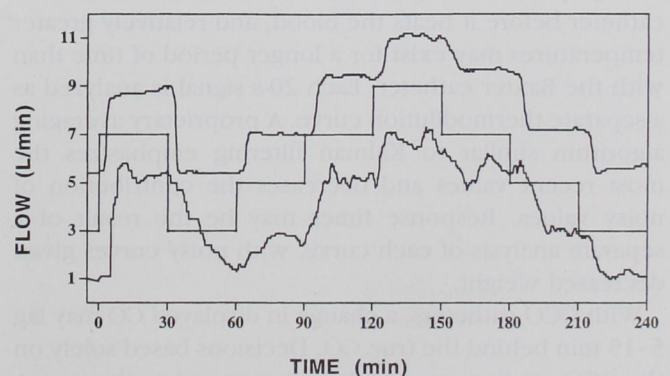

Fig. 2. Response of a representative Abbott and Baxter catheter to changes in flow. The set flow is displayed on the middle line. For visual clarity, the Abbott catheter readings are offset by +2 l/min and the Baxter catheter readings are offset by -2 l/min.

The CCO catheters used in the current study measure CO by modified thermodilution, whereby a thermal element intermittently warms the blood with a small amount of heat ("hot thermodilution"). In the current study, both systems had significant response delays that can be explained by their measuring techniques (see below). In addition, both catheters showed markedly prolonged response times when fluctuations in pulmonary artery temperature (thermal noise) were superimposed on the thermistor readings. In patients, thermal noise arises from ventilation, movement, and inflation/deflation of sequential compression stockings. Thermal noise may be larger than the thermal signal, resulting in a longer analysis period. Therefore, when CO acutely changes, the systems may not readily detect that change as separate from the variability of the previous measurements.

These two systems have different design features. The Baxter "Vigilance" CCO monitor has a flat heating filament that is activated for 1–4 s using a pseudorandom binary sequence to produce constant heat signals emitting 15 W of heat.<sup>27</sup> The resulting multiple superimposed signals are analyzed stochastically to determine a single thermodilution curve that is applicable to an entire set of data. It may be resistant to baseline thermal drift and intermittent thermal changes. However, the system may not be able to analyze rapid changes in CO because a single thermodilution curve will not be simultaneously applicable to data surrounding the CO change. Therefore, the system may require a long time delay until an adequate set of data has been collected at the new CO value.

The Abbott "Q-vue" system uses a coiled filament that emits heat for 20 s of a 40-s repetitive on-off cycle; the average power during the 40 s is 6 W. The coil heats the catheter before it heats the blood, and relatively greater temperatures may exist for a longer period of time than with the Baxter catheter. Each 20-s signal is analyzed as a separate thermodilution curve. A proprietary averaging algorithm similar to Kalman filtering emphasizes the most recent values and decreases the contribution of noisy values. Response times may be the result of a separate analysis of each curve, with noisy curves given decreased weight.

With CCO catheters, a change in displayed CO may lag 5–15 min behind the true CO. Decisions based solely on the CCO reading may result in inappropriate therapy. A better assessment of acute changes in CO may include a combination of the CCO reading, available hemodynamic parameters (heart rate and blood pressure), and

the  $\text{SvO}_2$  reading (available in both CCO systems).<sup>2</sup> In unstable patients with a CCO catheter, a standard bolus thermodilution CO is necessary for determining the current CO. Understanding the delayed response time of CCO catheters is important for appropriate clinical use.

## References

1. Bishop MH, Shoemaker WC, Appel PL, Wo CJ, Zwick C, Kram HB, Meade P, Kennedy F, Fleming AW: Relationship between supranormal circulatory values, time delays and outcome in severely traumatized patients. *Crit Care Med* 1993; 21:56–63
2. Nelson LD: The new pulmonary artery catheters: Continuous venous oximetry, right ventricular ejection fraction, and continuous cardiac output. *New Horiz* 1997; 5:251–8
3. Siegel LC, Hennessy MM, Pearl RG: Delayed time response of the continuous cardiac output pulmonary artery catheter. *Anesth Analg* 1996; 83:1173–7
4. Sageman WS, Amundson DE: Thoracic electrical bioimpedance measurement of cardiac output in post-aortocoronary bypass patients. *Crit Care Med* 1993; 21:1139–42
5. Bernstein DP: Continuous noninvasive real-time monitoring of stroke volume and cardiac output by thoracic electrical impedance. *Crit Care Med* 1986; 14:898–90
6. Wong DH, Tremper KK, Stemmer EA, O'Connor D, Wilbur S, Zaccari J, Reeves C, Weidhoff P, Trujillo RJ: Noninvasive cardiac output: Simultaneous comparison of two different methods with thermodilution. *ANESTHESIOLOGY* 1990; 72:784–92
7. Chandraratna PA, Nanna M, McKay C, Nimalasuriya A, Swinney R, Elkayam U, Rahimtoola SH: Determination of cardiac output by transcutaneous continuous-wave ultrasonic Doppler computer. *Am J Cardiol* 1984; 53:234–7
8. Huntsman LL, Gams E, Johnson CC, Fairbanks E: Transcutaneous determination of aortic blood-flow velocities in man. *Am Heart J* 1975; 89:605–12
9. Thangathuri D, Charbonnet C, Roessler P, Wo CC, Mikhail M, Yoshida R, Shoemaker WC: Continuous intraoperative noninvasive cardiac output monitoring using a new thoracic bioimpedance device. *J Cardiothor Vasc Anesth* 1997; 11:440–4
10. Daigle RE, Miller CW, Hstand MB, McLeod FD, Hokanson DE: Nontraumatic aortic blood flow sensing by use of an ultrasound esophageal probe. *J Appl Physiol* 1975; 38:1153–60
11. Freund PR: Transesophageal Doppler scanning versus thermodilution during general anesthesia. An initial comparison of cardiac output techniques. *Am J Surg* 1987; 153:490–4
12. Hausen B, Schafers HJ, Rohde R, Haverich A: Clinical evaluation of transtracheal Doppler for continuous cardiac output estimation. *Anesth Analg* 1992; 74:800–4
13. Abrams JH, Weber RE, Holmen KD: Transtracheal Doppler: A new procedure for continuous cardiac output measurement. *ANESTHESIOLOGY* 1989; 70:134–8
14. Ihlen H, Amile JP, Dale J, Forfang K, Nitter-Huag S, Otterstad JE, Simonsen S, Myhre E: Determination of cardiac output by Doppler echocardiography. *Br Heart J* 1984; 51:54–60
15. Pinto FJ, Siegel LC, Chenzbraun A, Schnittger I: On-line estimation of cardiac output with a new automated border detection system using transesophageal echocardiography: A preliminary comparison with thermodilution. *J Cardiothor Vasc Anesth* 1994; 8:625–30

## LABORATORY REPORT

16. Normann RA, Johnson RW, Messinger JE, Sohrab B: A continuous cardiac output computer based on thermodilution principles. *Ann Biomed Eng* 1989; 17:61-73
17. Yelderman ML, Ramsay MA, Quinn MD, Paulsen AW, McKown RC, Gillman PH: Continuous thermodilution cardiac output measurement in intensive care unit patients. *J Cardiothorac Vasc Anesth* 1992; 6:270-4
18. Yelderman M: Continuous cardiac output by thermodilution. *Int Anesthesiol Clin* 1993; 31:127-40
19. Boldt J, Menges T, Wollbruck M, Hammermann H, Hempelmann G: Is continuous cardiac output measurement using thermodilution reliable in the critically ill patient? *Crit Care Med* 1994; 22:1913-8
20. Böttiger BW, Soder M, Rauch H, Bohrer H, Motsch J, Bauer H, Martin E: Semi-continuous versus injectate cardiac output measurement in intensive care patients after cardiac surgery. *Intensive Care Med* 1996; 22:312-8
21. Le Tulzo Y, Belghith M, Seguin P, Dall'Ava J, Monchi M, Thomas R, Dhainaut JF: Reproducibility of thermodilution cardiac output determination in critically ill patients: Comparison between bolus and continuous method. *J Clin Monit* 1996; 12:379-85
22. Burchell SA, Yu M, Takiguchi SA, Ohta RM, Myers SA: Evaluation of a continuous cardiac output and mixed venous oxygen saturation catheter in critically ill surgical patients. *Crit Care Med* 1997; 25:388-91
23. Haller M, Zollner C, Briegel J, Forst H: Evaluation of a new continuous thermodilution cardiac output monitor in critically ill patients: A prospective criterion standard study. *Crit Care Med* 1995; 23:860-6
24. Böttiger BW, Rauch H, Bohrer H, Motsch J, Soder M, Fleischer F, Martin E: Continuous versus intermittent cardiac output measurement in cardiac surgical patients undergoing hypothermic cardiopulmonary bypass. *J Cardiothorac Vasc Anes* 1995; 9:405-11
25. Böttiger BW, Sinner B, Motsch J, Bach A, Bauer H, Martin E: Continuous versus intermittent thermodilution cardiac output measurement during orthotopic liver transplantation. *Anesthesia* 1997; 52:207-14
26. Mihm FG, Gettinger A, Hanson CW, Gilbert HC, Stover EP, Vender J, Beerle B, Haddow G: A multicenter evaluation of a new continuous cardiac output pulmonary artery catheter system. *Crit Care Med* 1998; 26:1346-50
27. Yelderman M: Continuous measurement of cardiac output with the use of stochastic system identification techniques. *J Clin Monit* 1990; 6:322-32
